# Supplementary material for: An Efficient and Mild Method for the Synthesis and Hydrazinolysis of N‐Glyoxylamino Acid Esters
Source: Hindawi journal article supplement (doi:10.1155/2013/901745), 2013-01-01
Supplement: f1 [file 901745.f1.zip]

Archive with 8 entries (7 files):
- 901745.f1/
- 901745.f1/s1-1_chem_698795.docx
- 901745.f1/S1-4_CHEM_698796.docx
- 901745.f1/S1-7_CHEM_698797.docx
- 901745.f1/S10a-b_CHEM_698798.docx
- 901745.f1/S10c-d_CHEM_698799.docx
- 901745.f1/S11a-b_CHEM_698800.docx
- 901745.f1/S11c-d_CHEM_698801.docx
