# Supplementary material for: An Efficient and Mild Method for the Synthesis and Hydrazinolysis of N‐Glyoxylamino Acid Esters
Source: Hindawi journal article supplement (doi:10.1155/2013/901745), 2013-01-01
Supplement: f1 [file 901745.f1.zip › 901745.f1/s1-1_chem_698795.docx]

**An efficient and mild method for the synthesis and hydrazinolysis of *N* -glyoxylamino acid esters**

Ayman El-Faham**,*** 1,2 Zainab Al Marhoon,1 Ahmed Abdel-Megeed,3,4 Mohamed Siddiqui1

**Supporting information**

**Table of Content**

**S-1**

**IR & 1H &13C NMR of Compounds 2, 4, and 7**

**S-2**

**1H &13C NMR of Compounds 10a-d**

**S-3**

**1H &13C NMR of Compounds 11a-d**

**S-1**

**IR & 1H &13C NMR of Compounds 2, 4, and 7**
