# Supplementary material for: An Efficient and Mild Method for the Synthesis and Hydrazinolysis of N‐Glyoxylamino Acid Esters
Source: Hindawi journal article supplement (doi:10.1155/2013/901745), 2013-01-01
Supplement: f1 [file 901745.f1.zip › 901745.f1/S11a-b_CHEM_698800.docx]

**S-3**

**1H &13C NMR of Compounds 11a-g**
